# Supplementary material
Source: PubMed Central journal article supplement (PMC8817224)
Supplement: mmc1.pdf [file mmc1.pdf]

1 **Supplementary Material**

2

3

4 **Title**

5 **Prevalence and circulation patterns of SARS-CoV-2 variants in European**  
6 **sewage mirror clinical data of 54 European cities**

7

8 **Authors**

9 Shelesh Agrawal<sup>1\*</sup>, Laura Orschler<sup>1</sup>, Selina Schubert<sup>1</sup>, Kira Zachmann<sup>1</sup>, Leo Heijnen<sup>2</sup>, Simona  
10 Tavazzi<sup>3</sup>, Bernd Manfred Manfred, Miranda de Graaf<sup>4</sup>, Gertjan Medema<sup>2</sup>, Susanne Lackner<sup>1</sup>

11

12 **Affiliations**

13 <sup>1</sup> Technical University of Darmstadt, Department of Civil and Environmental Engineering  
14 Sciences, Institute IWAR, Chair of Water and Environmental Biotechnology; Darmstadt,  
15 Germany.

16 <sup>2</sup> KWR Water Research Institute; Nieuwegein, The Netherlands.

17 <sup>3</sup> European Commission, Joint Research Centre; Ispra (Va), Italy.

18 <sup>4</sup> Department of Viroscience, Erasmus Medical Center; Rotterdam, The Netherlands

19

20 \*Corresponding author. Email: [s.agrawal@iwar.tu-darmstadt.de](mailto:s.agrawal@iwar.tu-darmstadt.de)

21

22

23 **Mutations in clinical samples**

24 We determined the abundance spike protein mutations, which are suggested by the European  
25 Centre for Disease Prevention and Control (ECDC) for the characterization of the current VOCs  
26 (European Centre for Disease Prevention and Control, 2021a), reported for clinical human  
27 samples. We found that the abundance of the mutations varied for the respective country, though  
28 associated with the same VOC (Fig. S1). For example, four out of eight spike protein mutations  
29 for P.1 for sequences from Slovakia were not reported.

30

31 **SARS-CoV-2 RNA in wastewater samples**

32

33 *qPCR results*

34 SARS-CoV-2 N2-gene RNA was detected in all 54 samples in concentrations ranging from 0.4 -  
35 735 gene copies/ml (Fig. S3). The concentration protocol for NGS provided sufficient read depth  
36 (S. Table 1), even with the low SARS-CoV-2 concentration samples. The crassphage concentration  
37 (Fig. S3) is an index of the dilution of human fecal input in wastewater. This varied between the  
38 cities; in INF\_21002\_B and INF\_21003\_BA the Crassphage concentrations were markedly low,  
39 indicating high dilution of human fecal input in these wastewaters. Normalizing the SARS-CoV-  
40 2 N2 concentration for this dilution would markedly change the ranking of the wastewaters, which  
41 implies that normalization of 'raw' SARS-CoV-2 concentrations in wastewater for the level of  
42 dilution of human fecal input is necessary when linking these data to COVID-19 prevalence data.

43  
44 *Fraction of variants of concern in wastewater samples*

45 We determined the relative abundance of the VOCs based on the abundance of reads associated  
46 with certain AA mutations. As there is quite an overlap between the AA mutations of different  
47 SARS-COV-2 variants, for better determination of the relative abundance of the VOCs, we  
48 specifically looked for the abundance of unique and shared AA mutations corresponding to each  
49 VOC (Fig. S5). Categorization of mutations as unique or shared was based on the percentage of  
50 sequences for associated mutations submitted in GISAID. We looked for percentage of sequences  
51 for each mutation for every lineage. Then for each VOC, mutations reported in more than 0.5% of  
52 total number of sequences for each VOC were selected. Among these selected mutations,  
53 mutations that are associated with more than one lineage were categorized as shared mutation  
54 otherwise they were associated with the respective VOC.

55 The abundance of mutations associated with B.1.1.7 was highest among the samples ranging from  
56 15 to 40%, followed by abundance of mutations associated with B.1.351, P.1, and B.1.617 (Fig.  
57 S5), which is similar to the clinical sequencing data. The mutations associated with B.1.351 were  
58 detected in 33 samples, whereas for B.1.617 were detected in 21 samples and for P.1 in 15 samples.  
59 B.1.351 mutations were detected in all samples from Finland, Germany, and Sweden; however,  
60 the total relative abundance of these mutations varied from 2 to 8%. The relative abundance of the  
61 shared AA mutations accounted for 55 to 70% across all samples (Fig. S5).

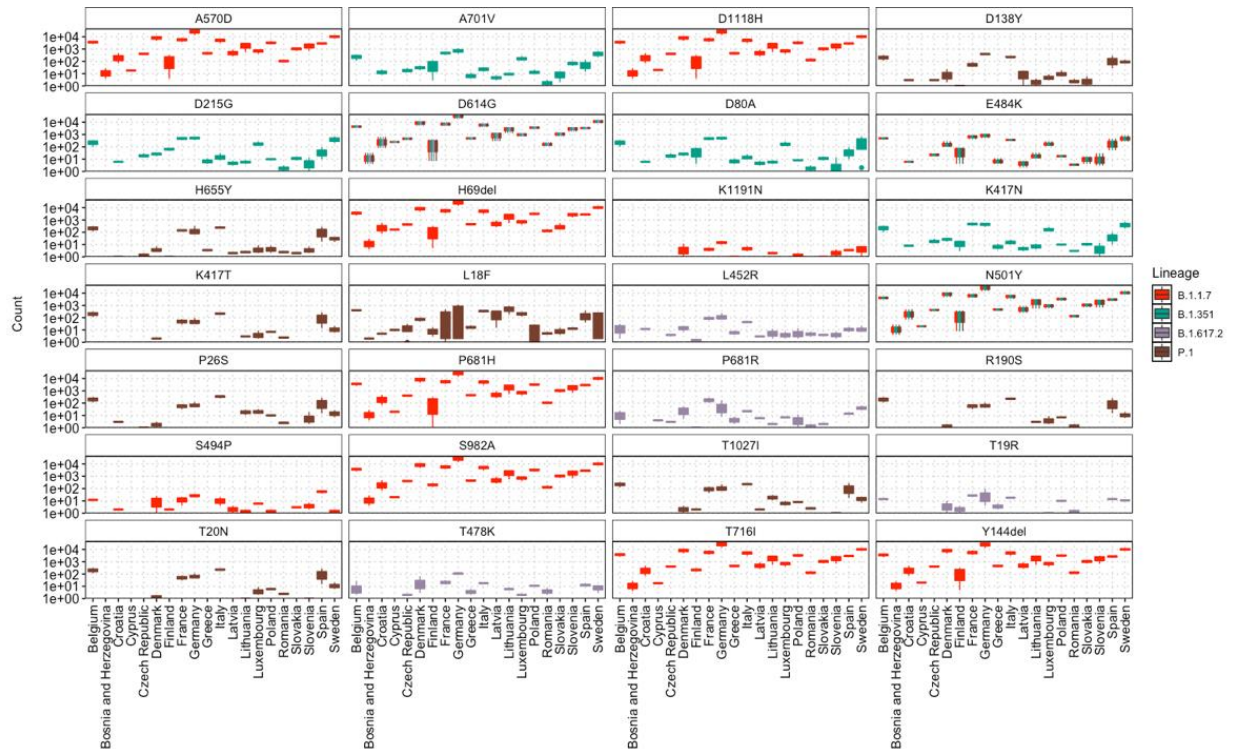

62

63 **Fig. S1.** Count (occurrence of mutation in number of genome sequences submitted in GISAID)  
 64 of spike protein mutations, which are considered for characterization of VOC by ECDC  
 65 (European Centre for Disease Prevention and Control, 2021b, 2021c), found in the variant  
 66 surveillance data for clinical samples of GISAID dated 31st May 2021. The counts are presented  
 67 in log<sub>10</sub> scale.

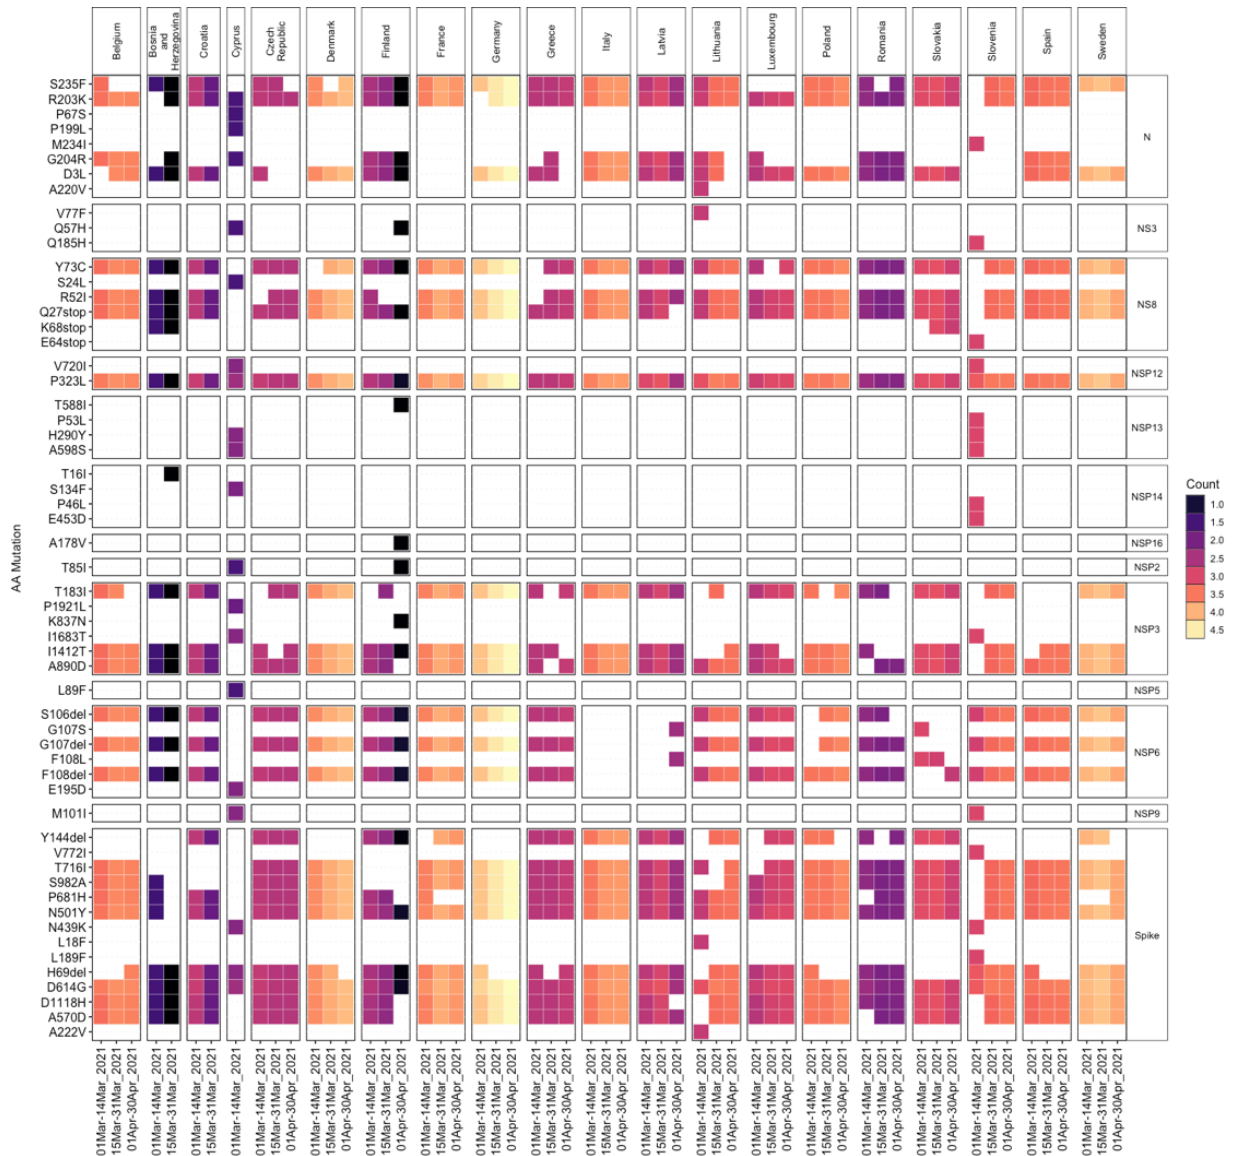

70 **Fig. S2.** Heatmap representing the top 20 abundant mutations in each country during different time  
 71 period, based on the count (occurrence of mutation in genome sequences submitted in GISAID)  
 72 of the mutations.

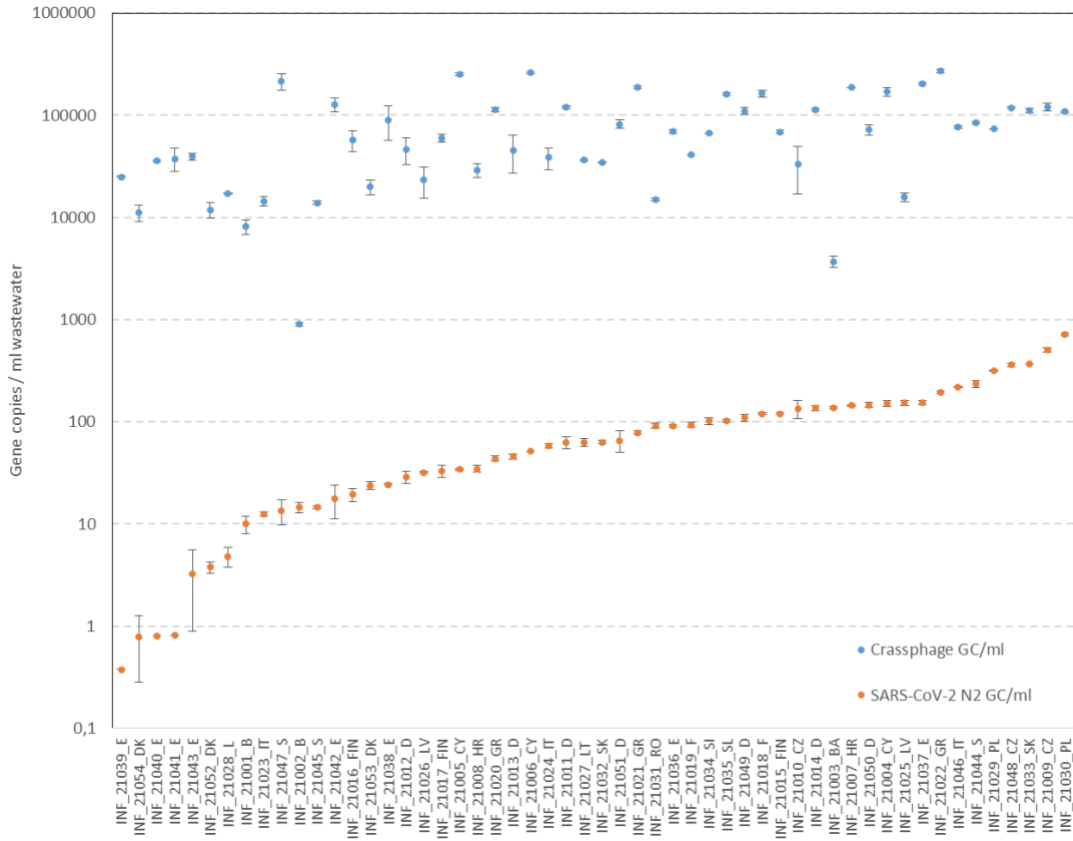

73

74 **Fig. S3.** qPCR based analysis showing the concentration of SARS-CoV-2 N2 gene copies  
75 detected in each sample.

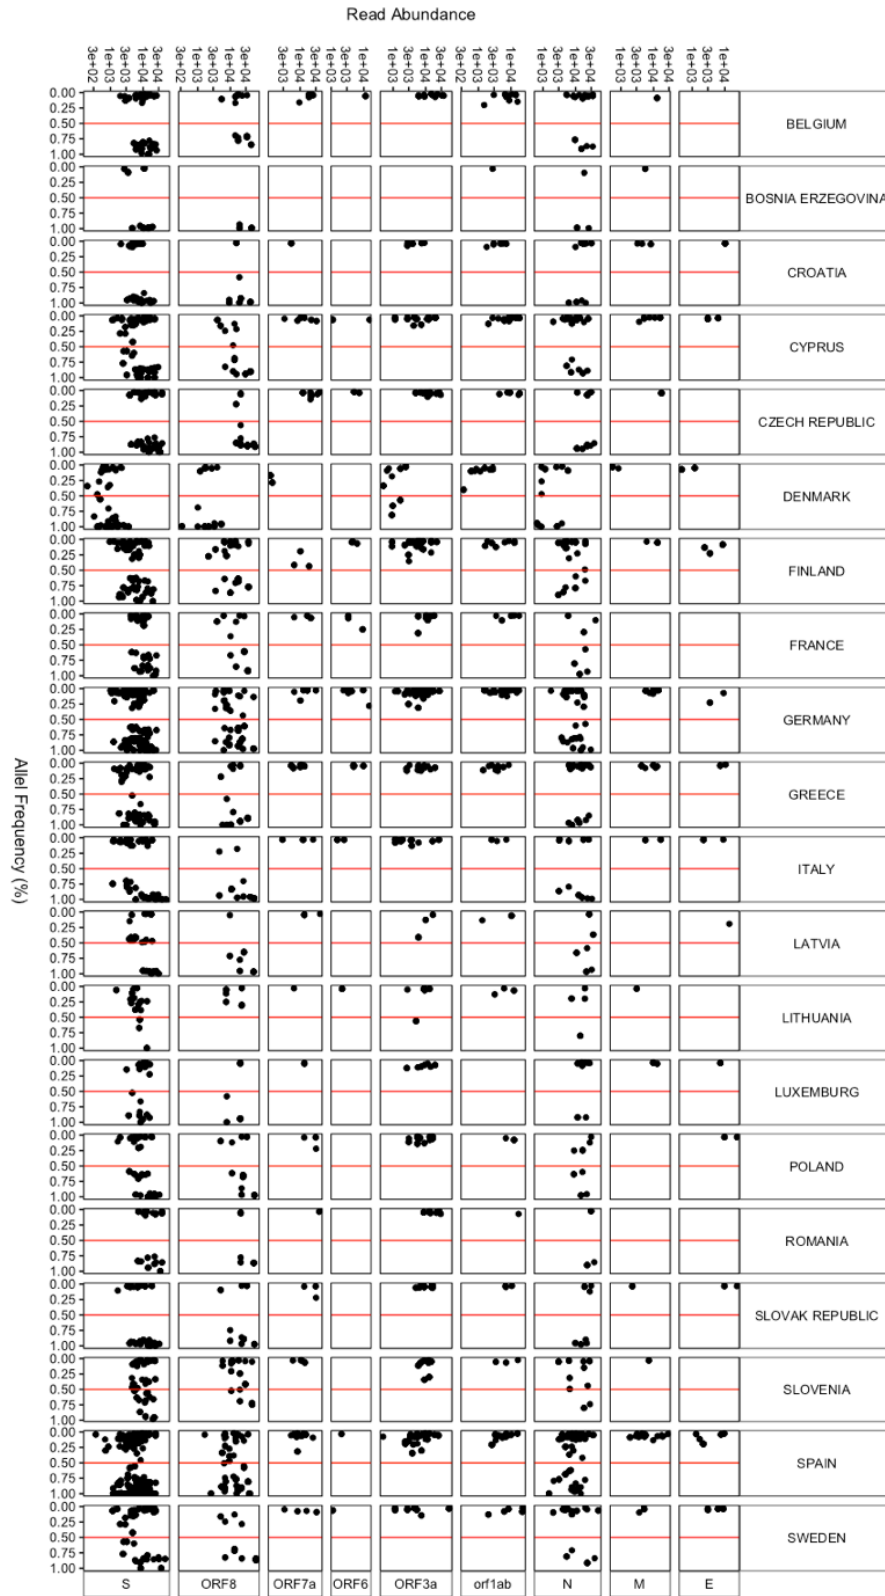

76  
77  
78  
79

**Fig. S4.** Scatter plot showing the distribution of the read abundance of each mutation against the allele frequency of each mutation.

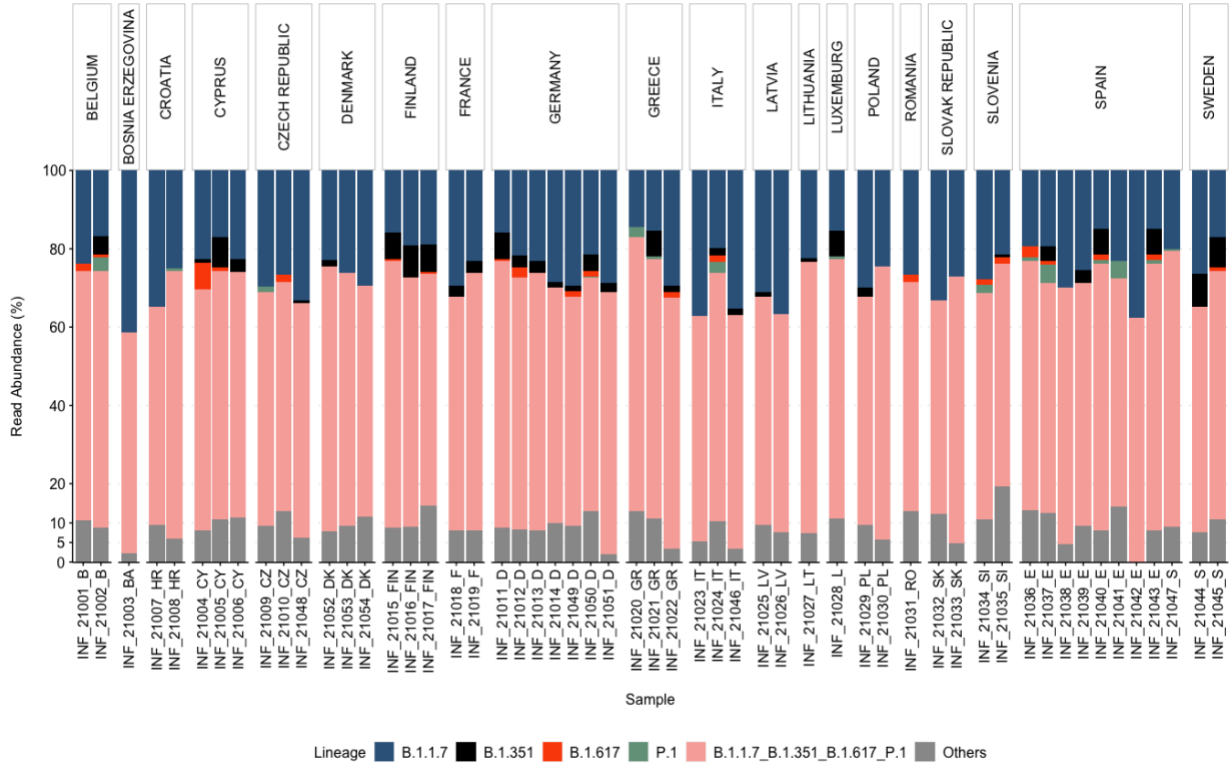

80  
81  
82  
83  
84

**Fig. S5.** Relative abundance of the variants of concern (VOC) and other variants, based on the abundance of the reads associated with each SNP, respectively. AA mutations shared among different SARS-CoV-2 VOCs are represented as “B.1.1.7\_B.1.351\_B.1.617\_P.1”.

85 **Table S1. Summary of sequencing data for all samples.**

| S.No. | Country           | SampleID  | Total number of reads | No. of mapped reads | Avg read identity to target (%)* | S.No. | Country          | SampleID | Total number of reads | No. of mapped reads | Avg read identity to target (%)* |
|-------|-------------------|-----------|-----------------------|---------------------|----------------------------------|-------|------------------|----------|-----------------------|---------------------|----------------------------------|
| 1     | BELGIUM           | 21001_B   | 2,808,905             | 2,088,647           | 99.55                            | 28    | GREECE           | 21022_GR | 2,786,455             | 1,788,408           | 99.48                            |
| 2     | BELGIUM           | 21002_B   | 2,680,409             | 1,893,060           | 99.53                            | 29    | GREECE           | 21020_GR | 2,468,367             | 1,110,096           | 99.32                            |
| 3     | BOSNIA ERZEGOVINA | 21003_BA  | 2,508,512             | 1,766,499           | 99.51                            | 30    | ITALY            | 21023_IT | 3,496,150             | 2,969,772           | 99.52                            |
| 4     | CROATIA           | 21007_HR  | 2,552,070             | 1,870,713           | 99.64                            | 31    | ITALY            | 21024_IT | 1,725,352             | 818,506             | 99.48                            |
| 5     | CROATIA           | 21008_HR  | 2,111,859             | 1,273,558           | 99.55                            | 32    | ITALY            | 21046_IT | 3,260,879             | 2,256,762           | 99.52                            |
| 6     | CYPRUS            | 21004_CY  | 2,686,062             | 1,607,809           | 99.57                            | 33    | LATVIA           | 21026_LV | 3,546,039             | 2,496,946           | 99.54                            |
| 7     | CYPRUS            | 21005_CY  | 2,044,674             | 829,904             | 98.07                            | 34    | LATVIA           | 21025_LV | 2,063,000             | 1,247,974           | 99.39                            |
| 8     | CYPRUS            | 21006_CY  | 3,150,002             | 2,428,422           | 99.53                            | 35    | LITHUNIA         | 21027_LT | 2,596,024             | 1,391,166           | 99.63                            |
| 9     | CZECH REPUBLIC    | 21009_CZ  | 3,290,470             | 2,840,707           | 99.21                            | 36    | LUXEMBOURG       | 21028_L  | 2,554,722             | 1,565,165           | 99.72                            |
| 10    | CZECH REPUBLIC    | 21010_CZ  | 3,754,585             | 2,804,456           | 99.55                            | 37    | POLAND           | 21030_PL | 3,538,732             | 3,215,972           | 99.32                            |
| 11    | CZECH REPUBLIC    | 21048_CZ  | 3,436,877             | 2,688,684           | 99.57                            | 38    | POLAND           | 21029_PL | 2,209,073             | 1,375,405           | 99.57                            |
| 12    | DENMARK           | 21052_DK  | 3,273,309             | 763,257             | 99.37                            | 39    | ROMANIA          | 21031_RO | 2,784,858             | 2,119,141           | 99.64                            |
| 13    | DENMARK           | 21053_DK  | 2,547,875             | 817,493             | 99.58                            | 40    | SLOVAK REPLUBLIC | 21033_SK | 3,345,138             | 2,507,501           | 99.58                            |
| 14    | DENMARK           | 21054_DK  | 2,608,811             | 809,437             | 98.17                            | 41    | SLOVAK REPUBLIC  | 21032_SK | 2,589,970             | 1,469,732           | 98.66                            |
| 15    | FINLAND           | 21015_FIN | 2,539,762             | 1,135,620           | 99.49                            | 42    | SLOVENIA         | 21034_SI | 2,838,240             | 1,941,543           | 99.52                            |
| 16    | FINLAND           | 21017_FIN | 2,831,785             | 1,852,350           | 99.60                            | 43    | SLOVENIA         | 21035_SI | 2,470,338             | 1,544,585           | 99.63                            |
| 17    | FINLAND           | 21016_FIN | 1,918,714             | 776,343             | 99.55                            | 44    | SPAIN            | 21039_E  | 2,683,669             | 1,964,724           | 99.52                            |
| 18    | FRANCE            | 21018_F   | 2,731,094             | 1,892,165           | 99.48                            | 45    | SPAIN            | 21040_E  | 2,284,844             | 1,014,470           | 99.54                            |
| 19    | FRANCE            | 21019_F   | 2,485,475             | 1,568,069           | 99.52                            | 46    | SPAIN            | 21043_E  | 1,935,880             | 695,817             | 98.89                            |
| 20    | GERMANY           | 21011_D   | 2,421,764             | 1,150,371           | 99.51                            | 47    | SPAIN            | 21047_S  | 2,280,905             | 1,133,647           | 99.45                            |
| 21    | GERMANY           | 21013_D   | 2,204,439             | 1,523,263           | 99.51                            | 48    | SPAIN            | 21036_E  | 2,252,726             | 1,019,145           | 99.52                            |
| 22    | GERMANY           | 21051_D   | 2,862,135             | 2,144,701           | 99.54                            | 49    | SPAIN            | 21041_E  | 2,484,336             | 1,410,983           | 99.21                            |
| 23    | GERMANY           | 21012_D   | 1,788,643             | 810,402             | 99.52                            | 50    | SPAIN            | 21042_E  | 1,897,633             | 601,931             | 99.02                            |
| 24    | GERMANY           | 21014_D   | 2,914,973             | 1,378,621           | 99.58                            | 51    | SPAIN            | 21037_E  | 2,913,114             | 1,747,719           | 99.50                            |
| 25    | GERMANY           | 21050_D   | 3,253,048             | 1,638,447           | 99.52                            | 52    | SPAIN            | 21038_E  | 2,426,135             | 1,386,068           | 99.53                            |
| 26    | GERMANY           | 21049_D   | 2,532,868             | 1,200,315           | 99.52                            | 53    | SWEDEN           | 21044_S  | 3,462,193             | 2,738,247           | 99.60                            |
| 27    | GREECE            | 21021_GR  | 2,022,878             | 818,984             | 99.45                            | 54    | SWEDEN           | 21045_S  | 2,932,821             | 1,063,215           | 99.63                            |

86 \*The target sequence was the SARS-CoV-2 reference genome (Wuhan-Hu-1 [GenBank accession numbers  
87 NC\_045512 and MN908947.3]).  
88

89 **SI References**

90  
91 European Centre for Disease Prevention and Control, 2021a. SARS-CoV-2 variants of concern as of 3 June 2021  
92 [WWW Document]. European Centre for Disease Prevention and Control. URL  
93 <https://www.ecdc.europa.eu/en/covid-19/variants-concern> (accessed 6.6.21).  
94 European Centre for Disease Prevention and Control, 2021b. Detection and characterisation capability and capacity  
95 for SARS-CoV-2 variants within the EU/EEA [WWW Document]. European Centre for Disease  
96 Prevention and Control. URL [https://www.ecdc.europa.eu/en/publications-data/detection-and-](https://www.ecdc.europa.eu/en/publications-data/detection-and-characterisation-capability-and-capacity-sars-cov-2-variants)  
97 [characterisation-capability-and-capacity-sars-cov-2-variants](https://www.ecdc.europa.eu/en/publications-data/detection-and-characterisation-capability-and-capacity-sars-cov-2-variants) (accessed 4.5.21).  
98 European Centre for Disease Prevention and Control, 2021c. Risk related to the spread of new SARS-CoV-2  
99 variants of concern in the EU/EEA - first update. Stockholm.



100 **Data S1. Coverage overview**

101 Complete list of all coverage overview graphs for all samples that were analyzed in this study.

102

| S.No. | Country           | SampleID | Coverage overview |
|-------|-------------------|----------|-------------------|
| 1     | BELGIUM           | 21001_B  |                   |
| 2     | BELGIUM           | 21002_B  |                   |
| 3     | BOSNIA ERZEGOVINA | 21003_BA |                   |
| 4     | CROATIA           | 21007_HR |                   |
| 5     | CROATIA           | 21008_HR |                   |
| 6     | CYPRUS            | 21004_CY |                   |
| 7     | CYPRUS            | 21005_CY |                   |
| 8     | CYPRUS            | 21006_CY |                   |
| 9     | CZECH REPUBLIC    | 21009_CZ |                   |

| S.No. | Country        | SampleID  | Coverage overview |
|-------|----------------|-----------|-------------------|
| 10    | CZECH REPUBLIC | 21010_CZ  |                   |
| 11    | CZECH REPUBLIC | 21048_CZ  |                   |
| 12    | DENMARK        | 21052_DK  |                   |
| 13    | DENMARK        | 21053_DK  |                   |
| 14    | DENMARK        | 21054_DK  |                   |
| 15    | FINLAND        | 21015_FIN |                   |
| 16    | FINLAND        | 21017_FIN |                   |
| 17    | FINLAND        | 21016_FIN |                   |

| S.No. | Country | SampleID | Coverage overview |
|-------|---------|----------|-------------------|
| 18    | FRANCE  | 21018_F  |                   |
| 19    | FRANCE  | 21019_F  |                   |
| 20    | GERMANY | 21011_D  |                   |
| 21    | GERMANY | 21013_D  |                   |
| 22    | GERMANY | 21051_D  |                   |
| 23    | GERMANY | 21012_D  |                   |
| 24    | GERMANY | 21014_D  |                   |
| 25    | GERMANY | 21050_D  |                   |
| 26    | GERMANY | 21049_D  |                   |

| S.No. | Country  | SampleID | Coverage overview |
|-------|----------|----------|-------------------|
| 27    | GREECE   | 21021_GR |                   |
| 28    | GREECE   | 21022_GR |                   |
| 29    | GREECE   | 21020_GR |                   |
| 30    | ITALY    | 21023_IT |                   |
| 31    | ITALY    | 21024_IT |                   |
| 32    | ITALY    | 21046_IT |                   |
| 33    | LATVIA   | 21026_LV |                   |
| 34    | LATVIA   | 21025_LV |                   |
| 35    | LITHUNIA | 21027_LT |                   |

| S.No. | Country            | SampleID | Coverage overview |
|-------|--------------------|----------|-------------------|
| 36    | LUXEMBOURG         | 21028_L  |                   |
| 37    | POLAND             | 21030_PL |                   |
| 38    | POLAND             | 21029_PL |                   |
| 39    | ROMANIA            | 21031_RO |                   |
| 40    | SLOVAK<br>REPUBLIC | 21033_SK |                   |
| 41    | SLOVAK<br>REPUBLIC | 21032_SK |                   |
| 42    | SLOVENIA           | 21034_SI |                   |
| 43    | SLOVENIA           | 21035_SI |                   |
| 44    | SPAIN              | 21039_E  |                   |

| S.No. | Country | SampleID | Coverage overview |
|-------|---------|----------|-------------------|
| 45    | SPAIN   | 21040_E  |                   |
| 46    | SPAIN   | 21043_E  |                   |
| 47    | SPAIN   | 21047_S  |                   |
| 48    | SPAIN   | 21036_E  |                   |
| 49    | SPAIN   | 21041_E  |                   |
| 50    | SPAIN   | 21042_E  |                   |
| 51    | SPAIN   | 21037_E  |                   |
| 52    | SPAIN   | 21038_E  |                   |
| 53    | SWEDEN  | 21044_S  |                   |

| S.No. | Country | SampleID | Coverage overview                                                                                                                                                               |
|-------|---------|----------|---------------------------------------------------------------------------------------------------------------------------------------------------------------------------------|
| 54    | SWEDEN  | 21045_S  | 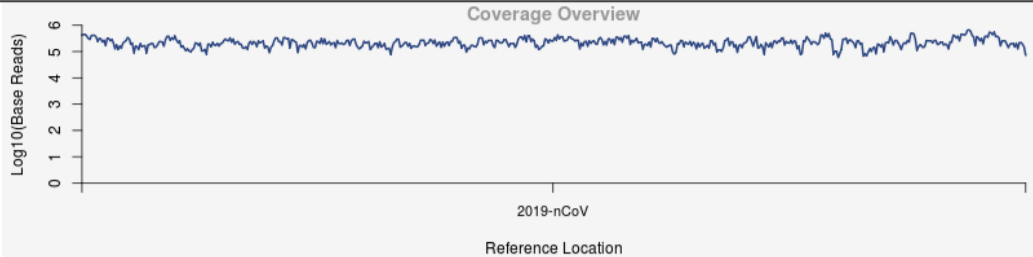 <p>Coverage Overview</p> <p>Log10(Base Reads)</p> <p>2019-nCoV</p> <p>Reference Location</p> |
